# Supplementary material
Source: PubMed Central journal article supplement (PMC122200)
Supplement: pnas_99_3_1389__4.pdf [file pnas_99_3_1389__4.pdf]

Supporting information for Hurtt *et al.* (2002) *Proc. Natl. Acad. Sci. USA* **99** (3), 1389–1394. (10.1073/pnas.012249999)

#### **Appendix 4**

ED produced estimates of the spatio-temporal pattern of fire frequency from 1700 to 1990 using a fire sub-model. Maps of relative fire frequency from ED are presented in Fig. 5 at four time intervals that are analogous to the maps in Fig. 1.

Note from Fig. 5 that most fires are estimated to occur in the West and South. Also note the dramatic decrease in the frequency of fires nationwide since 1920.
