# Supplementary material
Source: PubMed Central journal article supplement (PMC122200)

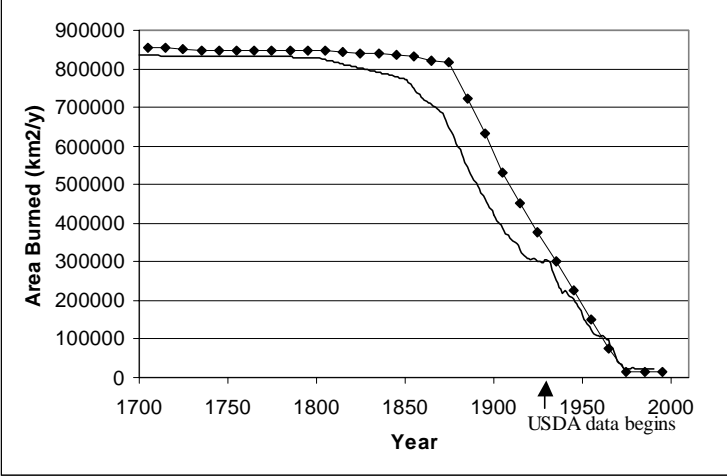

Supplement: pnas_99_3_1389__10.pdf [file pnas_99_3_1389__10.pdf]

1700

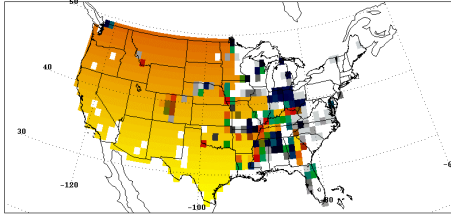

1850

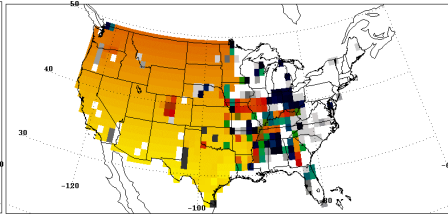

1920

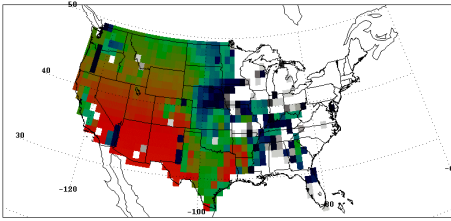

1990

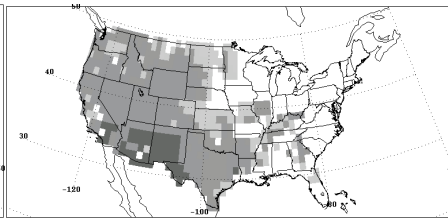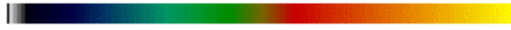

low

med

high

Supplement: pnas_99_3_1389__11.pdf [file pnas_99_3_1389__11.pdf]

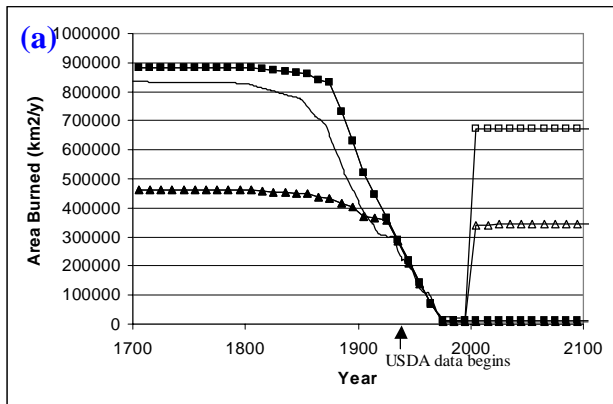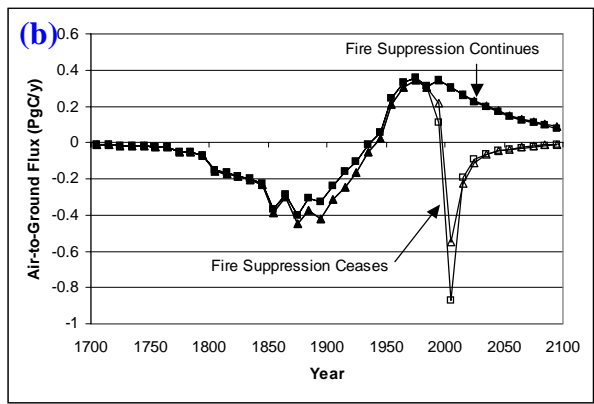

Supplement: pnas_99_3_1389__12.pdf [file pnas_99_3_1389__12.pdf]
